# Supplementary material for: Working (longer than) 9 to 5: are there cardiometabolic health risks for young Australian workers who report longer than 38-h working weeks?
Source: Springer Nature journal article supplement (doi:10.1007/s00420-018-1289-4), 2018-01-18
Supplement: MOESM1 [file 15403454]

**Supplementary Table 1.** Mediated regression analyses with inclusion of BMI as a covariate showing the relationship between working hours and cardiometabolic risk factors directly, and the significance of mediation by total sleep time

| **CMR Factor** | **Factor** | ***B*** | ***SE*** | ***p*** | **95% CI** | **Model** | | |
| --- | --- | --- | --- | --- | --- | --- | --- | --- |
| **R2** | ***F*** | ***df*** |
| Glucose (*mmol/L*) | Working hours  *≤38h/week*  *>38h/week* | 0.11 | 0.04 | **0.003** | **0.04, 0.18** | 0.05 | 6.15 | 6,645 |
| *Relative indirect effect of working hours through TST* | | 0.01 | 0.01 | . | -0.00, 0.02 |  |  |  |
| HDL-Cholesterol (*mmol/L*) | Working hours  *≤38h/week*  *>38h/week* | -0.10 | 0.03 | **0.004** | **-0.13, -0.02** | 0.12 | 15.16 | 6,645 |
| *Relative indirect effect of working hours through TST* | | -0.00 | 0.00 | . | -0.01, 0.01 |  |  |  |

Note: total effects models adjusted for smoking, time demands (work only versus work and study), socioeconomic status and shift work (socioeconomic status represented as highest educational level attained) and BMI; boldface indicates significant direct relationships between working hours and cardiometabolic risk factors; cm, centimeters; mmol/L, millimol per litre; BMI, body mass index (log10 transformed); TST, total sleep time; CI, confidence interval
